# Supplementary material
Source: PubMed Central journal article supplement (PMC7610452)

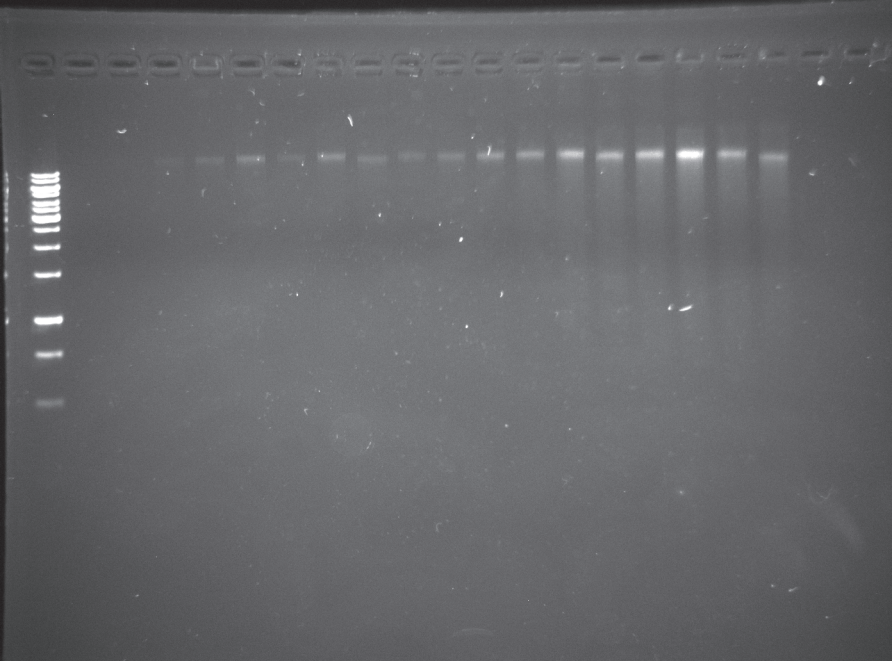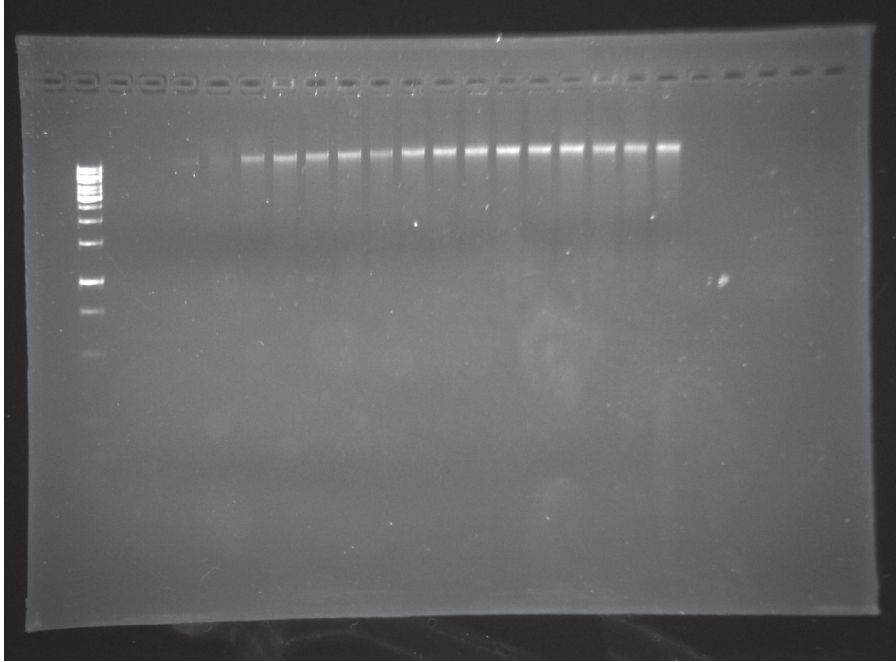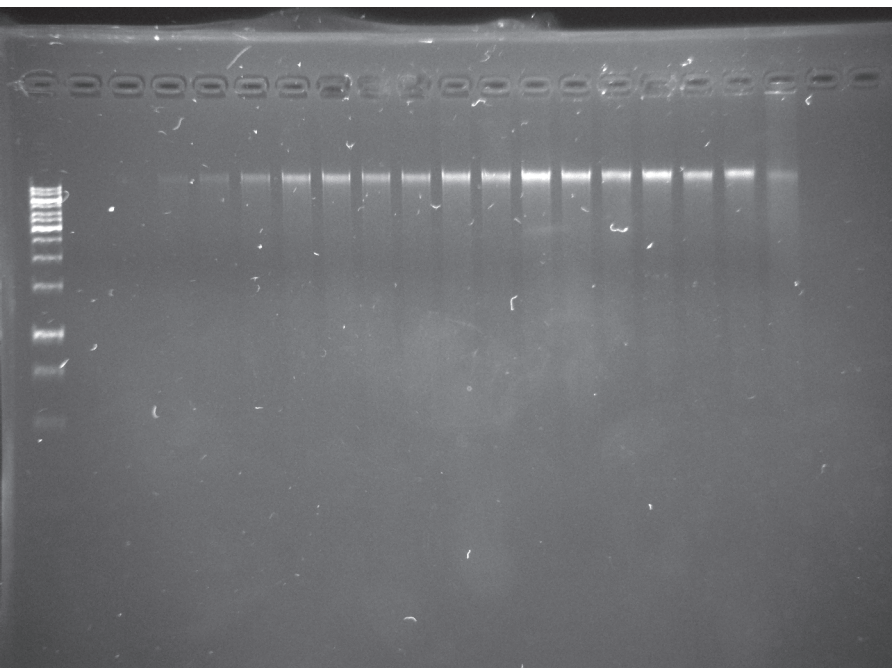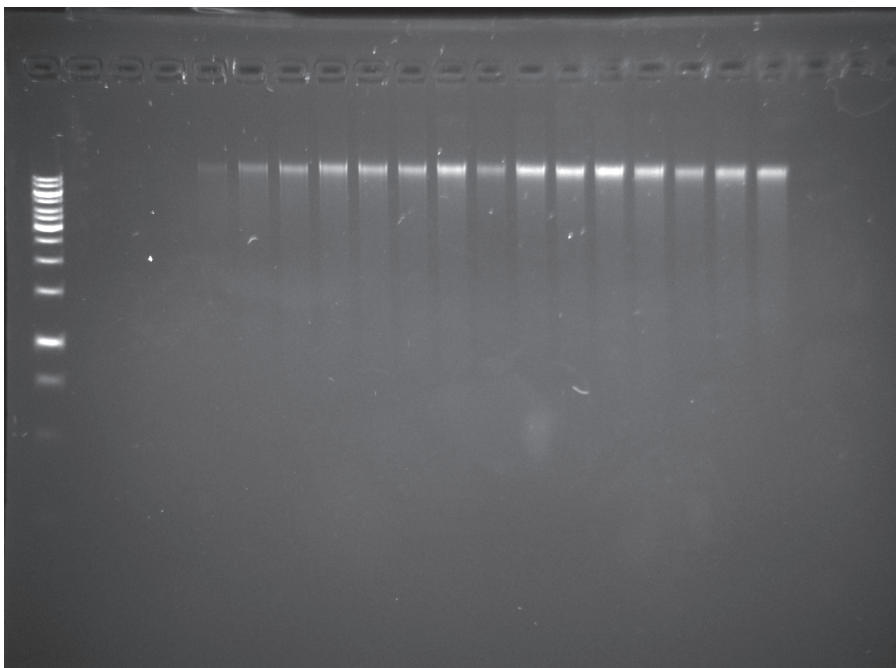

Supplement: EMS118379-supplement-Source_Data_for_Extended_Data_Figure_10.pdf [file EMS118379-supplement-Source_Data_for_Extended_Data_Figure_10.pdf]
